1           **Uncovering the gene machinery of the Amazon River microbiome to**  
2                                           **degrade rainforest organic matter**

3  
4   Célio Dias Santos Júnior<sup>1</sup>, Hugo Sarmento<sup>2</sup>, Fernando Pellon de Miranda<sup>3</sup>, Flávio Henrique-  
5   Silva<sup>1\*</sup>, Ramiro Logares<sup>4\*</sup>

6  
7   <sup>1</sup> Molecular Biology Laboratory. Department of Genetics and Evolution – DGE, Universidade  
8   Federal de São Carlos – UFSCar, São Carlos, 13565-905, SP / Brazil.

9  
10   <sup>2</sup> Laboratory of Microbial Processes & Biodiversity. Department of Hydrobiology – DHB,  
11   Universidade Federal de São Carlos – UFSCar, São Carlos, 13565-905, SP / Brazil.

12  
13   <sup>3</sup> Petróleo Brasileiro S.A. (Petrobras), Centro de Pesquisas e Desenvolvimento Leopoldo  
14   Américo Miguez de Mello, Rio de Janeiro, RJ, Brazil.

15  
16   <sup>4</sup> Institute of Marine Sciences (ICM), CSIC, Passeig Marítim de la Barceloneta, 37-49,  
17   ES08003, Barcelona, Catalonia, Spain.

18  
19  
20   \* **Corresponding authors:**

21   FHS: [dfhs@ufscar.br](mailto:dfhs@ufscar.br)

22   RL: [ramiro.logares@gmail.com](mailto:ramiro.logares@gmail.com).

23

24

25

26 **ABSTRACT**

27

28           The Amazon River receives, from the surrounding rainforest, huge amounts of  
29 terrestrial organic matter (TeOM), which is typically resistant to microbial degradation.  
30 However, only a small fraction of the TeOM ends up in the ocean, indicating that most of it is  
31 degraded in the river. So far, the nature of the genes involved in TeOM degradation and their  
32 spatial distributions are barely known. Here, we examined the Amazon River microbiome  
33 gene repertoire and found that it contains a substantial gene-novelty, compared to other  
34 environments (rivers and rainforest soil). We predicted ~3.7 million non-redundant genes,  
35 affiliating mostly to bacteria. The gene-functions involved in TeOM degradation revealed  
36 that lignin degradation correlated to tricarboxylates and hemicellulose processing, pointing to  
37 higher lignin degradation rates under consumption of labile compounds. We describe the  
38 biochemical machinery that could be speeding up the decomposition of recalcitrant  
39 compounds in Amazonian waters, previously reported only in incubation experiments.

40

41 **Keywords:** Amazon River, freshwater bacteria, biodiversity, metagenomics, lignin  
42 degradation, cellulose degradation, priming effect, gene catalogue

## 43 INTRODUCTION

44

45 Continental waters play a major biogeochemical role by linking terrestrial and  
46 marine ecosystems<sup>1</sup>. Riverine ecosystems receive terrestrial organic carbon, which is mostly  
47 processed by microorganisms, stimulating the conversion of terrestrially derived organic  
48 matter (TeOM), which can be recalcitrant, to carbon dioxide<sup>2-4</sup>. Therefore, riverine  
49 microbiomes should have evolved metabolisms capable of degrading TeOM. Even though the  
50 gene repertoire of river microbiomes can provide crucial insights to understand the links  
51 between terrestrial and marine ecosystems, as well as the fate of organic matter synthesized  
52 on land, very little is known about the genomic machinery of riverine microbes that degrade  
53 TeOM.

54 Microbiome gene catalogues allow the characterization of the functional repertoire,  
55 linking genes with ecological function and ecosystem services. Recently, large gene  
56 catalogues have been produced for the global ocean<sup>5-7</sup>, soils<sup>8</sup> and animal guts<sup>9,10</sup>. In  
57 particular, ~40 million genes have been reported for the global ocean microbiome<sup>7</sup> and ~160  
58 million genes for the global topsoil microbiome<sup>8</sup>.

59 So far, there is no comprehensive gene catalogue for rivers, which hinders our  
60 comprehension of the genomic machinery that degrade almost half of the 1.9 Pg C of  
61 recalcitrant TeOM that are discharged into rivers every year<sup>1</sup>. This is particularly relevant in  
62 tropical rainforests, like the Amazon forest, which accounts for ~10% of the global primary  
63 production, fixating 8.5 Pg C per year<sup>11,12</sup>. The Amazon River basin comprises almost 38%  
64 of continental South America<sup>13</sup> and its discharge accounts for 18% of the world's inland-  
65 water inputs to the oceans<sup>14</sup>. Despite its relevance for global scale processes, there is a limited  
66 understanding of the Amazon River microbiome, as well as microbiomes from other large  
67 tropical rivers.

68           The large amounts of organic and inorganic particulate material<sup>15</sup> turns the Amazon  
69 River into a turbid system. High turbidity reduces light penetration and, consequently, the  
70 Amazon River has very low rates of algal production<sup>16</sup>, meaning that the dissolved organic  
71 carbon cycling at the terrestrial–aquatic interface is the major carbon source for microbial  
72 growth<sup>17</sup>. High respiration rates in Amazon River waters generate a super-saturation that  
73 leads to CO<sub>2</sub> outgassing to the atmosphere. Overall, Amazon River outgassing accounts for  
74 0.5 Pg C per year to the atmosphere<sup>18</sup>, almost equivalent to the amount of carbon sequestered  
75 by the forest<sup>11,12</sup>. Despite the predominantly recalcitrant nature of the TeOM that is  
76 discharged into the Amazon River, heterotrophic microbes are able to degrade up to 55% of  
77 the lignin produced by the rainforest<sup>19,20</sup>. The unexpectedly high degradation rates of some  
78 TeOM compounds in the river was recently explained by the availability of labile compounds  
79 that promote the degradation of recalcitrant ones, a mechanism known as *priming effect*,  
80 which has been observed in incubation experiments<sup>20</sup>.

81           Determining the repertoire of gene-functions in the Amazon River microbiome is one  
82 of the key steps to understand the mechanisms involved in the degradation of complex TeOM  
83 produced by the rainforest. Given that most TeOM present in the Amazon River is lignin and  
84 cellulose<sup>19–23</sup>, the functions associated to their degradation were expected to be widespread in  
85 the Amazon microbiome. Instead, these functions exhibited very low abundances<sup>24–26</sup>,  
86 highlighting our limited understanding of the enzymes involved in the degradation of lignin  
87 and cellulose in aquatic systems.

88           Cellulolytic bacteria use an arsenal of enzymes with synergistic and complementary  
89 activities to degrade cellulose. For example, glycosyl-hydrolases (GHs) catalyze the  
90 hydrolysis of glycoside linkages, polysaccharide esterases support the action of GHs over  
91 hemicelluloses, and polysaccharide lyases promote depolymerisation<sup>27,28</sup>. In contrast, lignin is  
92 more resistant to degradation<sup>29</sup>, since its role is preventing microbial enzymes from degrading

93 labile cell-wall polysaccharides<sup>30</sup>. The microbial production of extracellular hydrogen-  
94 peroxide, a highly reactive compound, is the first step of lignin oxidation mediated by  
95 enzymes, like lignin peroxidase, manganese-dependent peroxidase and copper-dependent  
96 laccases<sup>31</sup>. Lignin oxidation also produces a complex mixture of aromatic compounds, which  
97 compose the humic fraction of dissolved carbon detected in previous studies in the Amazon  
98 River mainstream<sup>21,22</sup>. Lignin degradation tends to occur in oxic waters of the Amazon River,  
99 using the hydrogen peroxide produced by the metabolism of cellulose and hemicellulose<sup>32</sup>.  
100 Therefore, a higher amount of lignin degradation genes is expected in oxic waters.

101 Here, we produced the first gene catalogue of the world's largest rainforest river by  
102 analyzing 106 metagenomes (~500 x10<sup>9</sup> base pairs), originating from 30 stations covering a  
103 total of ~ 2,106 km, from the upper Solimões River to the Amazon River plume in the  
104 Atlantic Ocean. This gene catalogue was used to uncover and examine the genomic  
105 machinery of the Amazon River microbiome to metabolize large amounts of carbon  
106 originating from the surrounding rainforest. Specifically, we ask: How novel is the gene  
107 repertoire of the Amazon River microbiome? Which are the main functions associated to  
108 TeOM degradation? Do TeOM degradation genes and functions have a spatial distribution  
109 pattern? Is there any evidence of priming effect in TeOM degradation?

110

## 111 **RESULTS**

112

### 113 *Cataloguing the genes of the Amazon River microbiome*

114 Our original dataset contained 106 metagenomes from 30 different stations (**Fig. 1a**)  
115 covering ~ 2,106 km of the Amazon River and its continuum over the Atlantic Ocean.  
116 Metagenome assembly yielded 2,747,383 contigs  $\geq$  1,000 base pairs, in a total assembly  
117 length of ~ 5.5x10<sup>9</sup> base pairs (**Supplementary Table 1**). We predicted 6,074,767 genes

118 longer than 150 bp, allowing also for alternative initiation codons. After redundancy  
119 elimination through clustering genes with an identity >95% and an overlap >90% of the  
120 shorter gene, the *Amazon river basin Microbial non-redundant Gene Catalogue* (AMnrGC)  
121 included 3,748,772 non-redundant genes, with half of the genes with a length  $\geq 867$  bp. About  
122 52% of the AMnrGC genes were annotated with at least one database (**Fig. 1b**), while ~86%  
123 of the annotated genes were simultaneously annotated using two or more different databases.  
124 The gene and functional diversity recovered seemed to be representative of the total diversity  
125 present in the sampling sites, as indicated by the accumulation curves, which tended towards  
126 saturation (**Fig. 1c**).

127

### 128 *Patterns in the metagenomic composition of microbiomes*

129 We compared the metagenomic information contained in the Amazon River  
130 microbiome with that of Amazon rainforest soil and other rivers (Canada watersheds and  
131 Mississippi river). The k-mer comparison of microbiomes indicated they are different  
132 (**Fig.1d**), forming groups of heterogenous composition (significant  $\beta$  dispersion [that is,  
133 average distance of samples to the group centroid] - PERMUTEST,  $F = 25.7$ ,  $p < 0.001$ ). The  
134 metagenomic content of Amazon basin samples was different to the other compared  
135 microbiomes (PERMANOVA,  $R^2 = 0.10$ ,  $p = 9.99 \times 10^{-5}$ ; ANOSIM,  $R = 0.27$ ,  $p < 0.001$ ),  
136 which suggests that this basin, or tropical rivers in general, contain specific gene repertoires.  
137 The metagenomic composition of the five sampled sections of the Amazon River (Upstream,  
138 Downstream, Estuary, Plume and Ocean) were significantly different (PERMANOVA test,  $F$   
139  $= 1.52$ ,  $p < 9.9e-5$ ), indicating that they do represent different assemblages from a genetic  
140 perspective. Each of these groups was considered homogenous, since there was a non-  
141 significant  $\beta$  dispersion ( $F = 2.3$ ,  $p = 0.063$ ) among metagenomic samples in each group  
142 (**Supplementary Fig. 1**).

143 *Gene identification*

144 About 48% of the AMnrGC genes could not be annotated, due to lack of orthologs.  
145 Besides, even though ~1.6% of the genes in the AMnrGC were previously found in  
146 metagenomic studies, they were poorly characterized, without being assigned to a particular  
147 taxon (here referred to as “Metagenomic” genes; **Fig. 1b**). Genes annotated exclusively  
148 through Hidden Markov Models (HMM) represented 13.3% of AMnrGC (**Fig. 1b**). As the  
149 annotation using HMM profiles does not rely on direct orthology to specific sequences, but  
150 on orthology to a protein family (which may include mixed taxonomic signal), we could not  
151 assign taxonomy to those genes and they are referred as “Unassigned genes” (**Fig. 1b**).

152 The previous highlights our limited understanding about the gene composition of the  
153 Amazon River microbiome, where most proteins (61.11%) do not have orthologs in main  
154 reference databases. Taxonomically assigned prokaryotic genes (35.7% bacterial and 0.6%  
155 archaeal) constituted the majority in the AMnrGC, with only 0.3% and 0.6% of the genes  
156 having eukaryotic or viral origin, respectively (**Fig. 1b**).

157

158 *General or core metabolisms*

159 The superclass “Metabolic processes” from the Clusters of Orthologous Genes  
160 (COG) database comprises those gene-functions belonging either to energy production and  
161 conversion; amino acids, nucleotides, carbohydrates, coenzymes, lipids and inorganic ions  
162 transport and metabolism; and secondary metabolites biosynthesis, transport, and catabolism.  
163 This superclass was the most abundant in the AMnrGC (35.8% of the genes annotated with  
164 COG classes), **Fig. 2**. Genes with unknown function represented 21.4% of the COG-class  
165 annotated proteins.

166 Metabolism core functions were defined as those involved in cell or ecosystem  
167 homeostasis, normally representing the minimal metabolic machinery needed to survive in a

168 given environment. KEGG and PFAM databases were used to determine the bacterial  
169 functional core, also allowing the identification of metabolic pathways. Core functions  
170 represented ~8% of KEGG and PFAM functions, and were mostly related to a general carbon  
171 metabolism, mostly associated to general organic matter oxidation until CO<sub>2</sub> and the  
172 microbial respiration byproducts heading to acetogenic pathways. Besides the core, the most  
173 abundant proteins can reveal essential biochemical pathways in microbiomes. The top 100  
174 most abundant functions in the bacterial core were “house-keeping” functions involved in  
175 main metabolic pathways (e.g. carbohydrate metabolism, *quorum sensing*, transporters and  
176 amino-acid metabolism), as well as important protein complexes (e.g. RNA and DNA  
177 polymerases and ATP synthase).

178

#### 179 *TeOM degradation machinery*

180 A total of 6,516 genes from the AMnrGC were identified as taking part in the TeOM  
181 degradation machinery of the Amazon River microbiome, being divided into: cellulose  
182 degradation (143 genes), hemicellulose degradation (92 genes), lignin oxidation (73 genes),  
183 lignin-derived aromatic compounds transport and metabolism (2,324 genes) and  
184 tricarboxylate transport (3,884 genes) [**Supplementary Fig. 2**]. The huge gene diversity  
185 associated to metabolism of lignin-derived compounds and the transport of tricarboxylates  
186 reflects the molecular diversity of the compounds generated, respectively, in the lignin  
187 oxidation process and present in Amazon freshwaters as humic and fulvic acids.

188

#### 189 *Initial steps of TeOM degradation: lignin oxidation and deconstruction of cellulose and* 190 *hemicellulose*

191 TeOM consists of biopolymers, so the first step of its microbial degradation consists  
192 in converting polymers into monomers. Thus, the identified genes involved in the oxidation



193 of lignin and degradation of cellulose and hemicellulose were investigated (**Supplementary**  
194 **Fig. 2**). We found that the lignin oxidation in the Amazon River is mainly mediated by dye-  
195 decolorizing peroxidases (DyPs) and predominantly associated to freshwaters. Only laccases  
196 and peroxidases were found in the Amazon River microbiome, no other families involved in  
197 lignin oxidation, like phenolic acid decarboxylase or glyoxal oxidase, were found. In turn,  
198 hemicellulose degradation seems to be performed mainly by glycosyl hydrolase GH10 in all  
199 river sections. We observed a similar ubiquitous dominance of glycosyl hydrolase GH3 in  
200 cellulose degradation across river sections. Interestingly, according to the gene content,  
201 cellulose and hemicellulose degradation seemed to replace lignin oxidation in brackish  
202 waters, suggesting the aging of TeOM during its flow through the river.

203

#### 204 *Lignin-derived aromatic compounds degradation*

205 Following the initial degradation of lignin, plenty of aromatic compounds are  
206 released. These can be divided into aromatic monomers (monoaryls) or dimers (diaryls),  
207 which can be processed through several biochemical steps (also called funneling pathways)  
208 until being converted into vanilate or syringate. These compounds can be processed through  
209 the O-demethylation/C1 metabolism and ring cleavage pathways to form pyruvate or  
210 oxaloacetate, which can be incorporated to the TCA cycle of the cells, generating energy. The  
211 genes identified in the AMnrGC belonging to these pathways were examined.

212 All known functions taking place in the metabolism of lignin-derived aromatic  
213 compounds were found in the AMnrGC, except the gene *ligD*, a C $\alpha$ -dehydrogenase for  $\alpha$ R-  
214 isomers of  $\beta$ -aryl ethers. The complete degradation pathway of lignin-derived compounds  
215 (**Supplementary Fig. 2d**) included 772 and 449 genes belonging to funneling pathways of  
216 diaryls and monoaryls, respectively. Examination of the pathways starting with vanilate and  
217 syringate revealed 346 genes responsible for the O-demethylation and C1-metabolism steps,

218 while 713 genes seemed responsible for the ring-cleavage pathway. Almost 47% of all genes  
219 related to the degradation of lignin-derived compounds in the AMnrGC belonged to 4 gene  
220 families (*ligH*, *desV*, *phcD* or *phcC*). These genes represent the main steps of intracellular  
221 lignin metabolism, which are, 1) funneling pathways leading to vanilate/syringate, 2) O-  
222 demethylation/C1 metabolism and 3) ring cleavage.

223 We evaluated whether genes associated to TeOM degradation had a spatial  
224 distribution pattern along the river course. For this, we used the linear geographic distance of  
225 samples from the Amazon River source in Peru as a reference. Distance was negatively  
226 correlated with the number of genes associated to lignin oxidation, hemicellulose  
227 degradation, ring cleavage pathway, tripartite tricarboxylate transporting and the AAHS  
228 transporters (**Fig. 3**). This suggests a potential reduction of the microbial gene repertoire  
229 related to lignin processing as the river approaches the ocean.

230 The gene machinery associated to the processing of lignin-derived aromatic  
231 compounds was positively correlated to lignin oxidation along the river course (**Fig. 3**),  
232 suggesting a co-processing of lignin and its byproducts. Lignin oxidation and hemicellulose  
233 degradation pathways were positively correlated (**Fig. 3**), supporting the idea that monomers  
234 of hemicellulose, mainly carbohydrates, could be priming lignin oxidation. Cellulose  
235 degradation was not correlated with lignin oxidation, but had a weak positive correlation to  
236 hemicellulose degradation (**Fig. 3**), suggesting a coupling between both pathways.

237 We did not find correlations between the different types of funneling pathways  
238 (FP\_Dimers and FP\_Monomers) and the linear geographic distance along the river course  
239 (**Fig. 3**). This indicates that the degradation of lignin-derived aromatic compounds was not  
240 restricted to any river section. Moreover, the number of genes related to hemi-/cellulose  
241 degradation was positively correlated to lignin-derived aromatic compounds degradation

242 pathways, revealing a potential co-metabolism of lignin-derived compounds and hemi-  
243 /cellulose degradation, instead of lignin-oxidation.

244

#### 245 *Transporters*

246 Lignin-derived aromatic compounds need to be transported from the extracellular  
247 environment to the cytoplasm prior to their degradation. Transporters that could be associated  
248 to lignin degradation (MFS transporter, AAHS family and ABC transporters) were found in  
249 the AMnrGC, while transporters from the MHS family, ITS superfamily and TRAP could not  
250 be found. MFS transporters were not correlated to any of the other examined pathways.  
251 AAHS transporters were negatively correlated to linear geographic distance, while the other  
252 transporter families did not show any type of correlation with distance (**Fig. 3**). Furthermore,  
253 AAHS and ABC transporters showed positive correlations to the funneling pathway of  
254 monoaryls, suggesting their transport by those transporter families. ABC transporters were  
255 positively correlated to O-demethylation and C1 metabolism, while AAHS and ABC  
256 transporters were correlated to the ring cleavage pathway. This suggests that ABC and AAHS  
257 transporters are relevant for the metabolism of monoaryls derived from lignin oxidation.

258 The tripartite tricarboxylate transporting (TTT) system was correlated to the  
259 processing of allochthonous organic material in the Amazon River. Three proteins compose  
260 this system, where one is responsible of capturing substrates in the extracellular space and  
261 bringing them to the transporting channel made by the other two proteins, which recognize  
262 the substrate binding protein and internalize the substrate. Interestingly, there is a huge  
263 diversity associated to the substrate binding proteins, since each protein is specific to one or a  
264 few substrates. Furthermore, the TTT system displayed a negative correlation with the linear  
265 geographic distance, suggesting its predominance in freshwaters sections (**Fig. 3**).

266           The TTT system was positively correlated to AAHS and ABC transporters (**Fig. 3**)  
267   suggesting functional complementarity, as the TTT would transport substrates not transported  
268   by the other transporter families. Furthermore, the TTT transporters showed a positive  
269   correlation with lignin oxidation and hemicellulose degradation, suggesting either the  
270   transport of the products of those processes by TTT family or a dependence of compounds  
271   transported by it.

272

## 273 **DISCUSSION**

274

275           The AMnrGC represents the first inland tropical water non-redundant microbial gene  
276   catalogue. It allowed us to expand considerably our comprehension of the world's largest  
277   river microbiome. Half of the ~3.7 millions genes in the AMnrGC had no orthologs,  
278   suggesting gene novelty. Yet, there is limited information about the gene repertoire in other  
279   rivers, preventing exhaustive comparisons. The analysis of k-mers indicated a distinct  
280   metagenomic composition in the Amazon River basin when compared to other rivers and to  
281   the Amazon rainforest soil. This suggests that evolutionary processes may have generated  
282   such diversity via local adaptation, although more samples from other rivers throughout the  
283   world would be necessary to test this hypothesis fully.

284           As expected, COG functions within the superclass “Metabolism” were the most  
285   abundant in the AMnrGC as well as in the upper Mississippi River<sup>34</sup>. A large fraction of these  
286   functions likely represents “core functional traits” shared across the tree of life. This was  
287   supported by the similar distribution of COGs along different sections of the Amazon River,  
288   which also points to “core functional traits” that are conserved throughout the river course. A  
289   set of core functions was also reported for the Mississippi River<sup>34</sup> as well as for the global  
290   Ocean<sup>7</sup>.

291 We observed a subset of gene functions present in fresh- and brackish water  
292 sections, pointing to common core functions present along the Amazon River basin. Yet,  
293 other genes displayed a heterogeneous distribution, pointing to salinity as a structuring  
294 variable. Salinity is known to affect microbial spatiotemporal distribution, and jumps across  
295 the salinity barrier are rare evolutionary events<sup>35</sup>. The plume section displayed higher gene  
296 diversity than the ocean, probably reflecting the coalescence of freshwater and marine  
297 microbial communities and their different genes<sup>36</sup>.

298 Core functions included a general carbohydrate metabolism and several transporter  
299 systems, mainly ABC transporters. This suggests a sophisticated machinery to process TeOM  
300 in the Amazon River, where TeOM degradation appears more related to acetogenic and  
301 methanotrophic pathways. This agrees with previous findings<sup>24</sup>, indicating a high expression  
302 of C1 metabolism genes (methane monooxygenase - *mmoB* and formaldehyde activating  
303 enzyme - *fae*). The non-core pathways suggest adaptations to a complex environment,  
304 including multiple genes related to xenobiotic biodegradation and secondary metabolism (that  
305 is, the production and consumption of compounds not directly related to cell survival).

306 Lignin-derived aromatic compounds need to be transported from the extracellular  
307 milieu to the cytoplasm to be degraded, and different transporting systems can be involved in  
308 this process<sup>37,38</sup>. In particular, previous studies showed that the TTT system was present in  
309 high quantities in the Amazon River, and this was attributed to a potential degradation of  
310 allochthonous organic matter<sup>33</sup>. Recent findings also suggest a TTT system related to the  
311 transport of TeOM degradation byproducts<sup>39,40</sup>. Little is known about these transporters, but  
312 our findings indicate that TTT is an abundant protein family in the Amazon River, suggesting  
313 that tricarboxylates are a common carbon source for prokaryotes in these waters. Our results  
314 suggest that the TTT transporters could be linked to lignin oxidation and hemicellulose  
315 degradation, supporting their role in TeOM degradation.

316           Based in our findings, we propose a model of the potential priming effect acting in  
317 ligno-cellulose complexes from the Amazon River (**Fig. 4**). In this model, there are two  
318 different communities co-existing in a consortium: one responsible for hemi-/cellulose  
319 degradation and another one responsible for lignin degradation. The first community releases  
320 extracellular enzymes (mainly glucosyl hydrolases from families GH3 and GH10), whose  
321 reaction produces carbohydrates. These sugars can provide structural carbon and energy for  
322 themselves and for the lignin degrader community. The lignolytic community can also use  
323 the cellulolytic byproducts to growth, promoting an oxidative metabolism. This oxidative  
324 metabolism triggers the production and secretion of reactive oxygen species (ROS). ROS are  
325 then used by DYPs and laccases secreted by lignolytic communities to oxidize lignin,  
326 exposing more hemi-/cellulose to cellulolytic communities and re-starting the cycle. Another  
327 important role of lignolytic communities is the degradation of lignin-derived aromatic  
328 compounds generated by the lignin oxidation. If those compounds are not degraded, they  
329 could inhibit cellulolytic enzymes and microbial growth<sup>41-44</sup>, preventing TeOM degradation.  
330 This cycle may be considered as a priming effect, where both communities benefit from each  
331 other.

332

## 333 **MATERIALS AND METHODS**

334

335           We analyzed 106 metagenomes<sup>45-48</sup> from 30 stations distributed along the Amazon  
336 river basin, with an average coverage of  $5.0 \times 10^9$  base pairs per metagenome (standard  
337 deviation of  $7.3 \times 10^9$  bp / metagenome). The stations from Solimões River and lakes in the  
338 Amazon River course, located upstream from the city of Manaus, until the Amazon River's  
339 plume in the Atlantic Ocean covered ~2,106 Km and were divided into 5 sections (**Fig. 1a**,  
340 **Supplementary Table 2**). These sections were: 1) *Upstream section* (upstream Manaus city);

341 2) *Downstream section* (placed between Manaus and the start of the Amazon River estuary. It  
342 includes the influx of particle-rich white waters from the Solimões River as well as the influx  
343 of humic waters from Negro River<sup>49,50</sup>), 3) *Estuary section* (part of the river that meets the  
344 Atlantic Ocean) and 4) *Plume section* (the area where the Ocean is influenced by the Amazon  
345 River inputs).

346 Samples were taken as previously indicated<sup>45–48</sup>. Depending on the original study,  
347 particle-associated microbes were defined as those passing the filter of 300 µm mesh-size and  
348 being retained in the filter of 2 - 5 µm mesh-size. Free-living microbes were defined as those  
349 passing the filter of 2 - 5 µm mesh-size, being retained in the filter of 0.2 µm mesh-size.  
350 DNA was extracted from the filters as previously indicated<sup>45–48</sup>. Metagenomes were obtained  
351 from libraries prepared with either Nextera or TruSeq kits. Different Illumina sequencing  
352 platforms were used: Genome Analyzer Iix, HiSeq 2500 or MiSeq. Additional information is  
353 provided in **Supplementary Table 2**.

354

### 355 *Metagenome processing*

356 Illumina adapters and poor quality bases were removed from metagenomes using  
357 Cutadapt<sup>51</sup>. Only reads longer than 80 bp, containing bases with  $Q \geq 24$ , were kept. The  
358 quality of the reads was checked with FASTQC<sup>52</sup>. Reads from metagenomes belonging to the  
359 same station were assembled together using MEGAHIT (v1.0)<sup>53</sup>, with the meta-large presets.  
360 Only contigs > 1 Kbp were considered, as recommended by previous work<sup>54</sup>. Assembly  
361 quality was assessed with QUAST<sup>55</sup>.

362

### 363 *Analysis of k-mer diversity over different environments*

364 A k-mer diversity analysis was used to compare the genetic information in the  
365 Amazon River microbiome against that in other microbiomes from Amazon forest soil or

366 temperate rivers (**Supplementary Table 3**). Specifically, the Amazon River metagenomes  
367 (106) were compared against 37 metagenomes from the Mississippi River<sup>56</sup>, 91  
368 metagenomes from three watersheds in Canada<sup>57</sup>, and 7 metagenomes from the Amazon  
369 forest soil<sup>58</sup>. The rationale to include soil metagenomes was to check whether genomic  
370 information in the river could derive from soils. K-mer comparisons were run with SIMKA  
371 (version 1.4)<sup>59</sup> normalizing by sample size. Low complexity reads and k-mers (Shannon  
372 index < 1.5) were discarded before SIMKA analyses. The resulting Jaccard's distance matrix  
373 was used to generate a non-metric multidimensional scaling (NMDS) analysis. Permutation  
374 tests were used to check the homogeneity of beta-dispersion in the groups, and permutational  
375 multivariate analysis of variance (PERMANOVA/ANOSIM) was used to test the groups'  
376 difference. Both analyzes were performed using the R package Vegan<sup>60</sup>.

377

#### 378 *Amazon River basin Microbial non-redundant Gene Catalogue (AMnrGC)*

379 Genes were predicted using Prodigal (version 2.6.3)<sup>61</sup>. Only open reading frames  
380 (ORFs) predicted as complete (i.e. accepting alternative initiation codons, and longer than  
381 150 bp) were considered in downstream analyses. Gene sequences were clustered into a non-  
382 redundant gene catalogue using CD-HIT-EST (version 4.6)<sup>62,63</sup> at 95% of nucleotide identity  
383 and 90% of overlap of the shorter gene<sup>5</sup>. Representative gene-sequences were used in  
384 downstream analyses. GC content per gene was inferred via Infoseq, EMBOSS package  
385 (version 6.6.0.0)<sup>64</sup>.

386

#### 387 *Gene abundance estimation*

388 The quality-trimmed sequencing reads were mapped to our non-redundant gene  
389 catalogue using BWA (version 0.7.12-r1039)<sup>65</sup> and SamTools (version 1.3.1)<sup>66</sup>. Gene  
390 abundances were estimated using the software eXpress (version 1.5.1)<sup>67</sup>, with no bias



391 correction, as the equivalent to transcripts per million (TPM) [Note that even though we use  
392 the common acronym TPM for simplicity, we have always used reads, no transcripts] . We  
393 used a  $TPM \geq 1.00$  for a gene to be present in a sample, and an average abundance higher  
394 than zero ( $\mu_{TPM} > 0.0$ ) for a gene to be present in a river section or water type (freshwater,  
395 brackish water or the mix of them in the plume).

396

### 397 *Functional annotation*

398 Representative genes (and their predicted amino acid sequences) were annotated by  
399 searching them against KEGG (Release 2015-10-12)<sup>68</sup>, COG (Release 2014)<sup>69</sup>, CAMERA  
400 Prokaryotic Proteins Database (Release 2014)<sup>70</sup> and UniProtKB (Release 2016-08)<sup>71</sup> via the  
401 Blastp algorithm implemented in Diamond (v.0.9.22)<sup>72</sup>, with a query coverage  $\geq 50\%$ ,  
402 identity  $\geq 45\%$ , e-value  $\leq 1e-5$  and score  $\geq 50$ . KO-pathway mapping was performed using  
403 KEGG mapper<sup>73</sup>. HMMSearch (version 3.1b1)<sup>74</sup> was used to search proteins against dbCAN  
404 (version 5)<sup>75</sup>, PFAM (version 30)<sup>76</sup> and eggNOG (version 4.5)<sup>77</sup> databases, using an e-value  $\leq$   
405  $1e-5$ , and posterior probability of aligned residues  $\geq 0.9$ , and no domain overlapping.  
406 Accumulation curves were obtained using random progressive nested comparisons with 100  
407 pseudo-replicates for genes and PFAM predictions.

408

### 409 *Gene taxonomic assignment*

410 Gene-taxonomy was assigned considering the best hits (score, e-value and identity;  
411 see above) using KEGG (Release 2015-10-12)<sup>68</sup>, UniProtKB (Release 2016-08)<sup>71</sup> and  
412 CAMERA Prokaryotic Proteins Database (Release 2014)<sup>70</sup>. Taxonomic last common  
413 ancestors (LCA) were determined from TaxIDs (NCBI) associated to UniRef100 and KO  
414 entries. Information from the CAMERA database was also used to retrieve taxonomy (NCBI  
415 TaxID). Proteins were annotated as 'unassigned' if their taxonomic signatures were mixed,

416 containing representatives from several domains of life, or if they only had the function  
417 assigned without taxonomic information. Reference sequences with hits to poorly annotated  
418 sequences from other metagenomes were referred as “Metagenomic”.

419

#### 420 *TeOM degradation machinery*

421 To investigate the TeOM degradation, we grouped samples by river section and  
422 assessed their gene contents. These genes were then searched against reference sequences and  
423 proteins families characterized as TeOM degrading functions, shown in **Supplementary**  
424 **Table 4.**

425 Lignin degradation starts with extracellular polymer oxidation followed by  
426 internalization and metabolism of the produced monomers or dimers by bacteria. Protein  
427 families related to lignin oxidation (PF05870, PF07250, PF11895, PF04261 and PF02578)  
428 were searched among PFAM-annotated genes. The genes related to the metabolism of lignin-  
429 derived aromatic compounds were annotated with Diamond (Blastp search mode; v.0.9.22)<sup>72</sup>,  
430 with query coverage  $\geq 50\%$  , protein identity  $\geq 40\%$  and e-value  $\leq 1e-5$  as recommended by  
431 Kamimura et al.<sup>37</sup>, using their dataset as reference.

432 Cellulose and hemicellulose degradation involves glycosyl hydrolases (GH). The  
433 most common cellulolytic protein families (GH1, GH3, GH5, GH6, GH8, GH9, GH12,  
434 GH45, GH48, GH51 and GH74)<sup>78</sup> and cellulose-binding motifs (CBM1, CBM2, CBM3,  
435 CBM6, CBM8, CBM30 and CBM44)<sup>78,79</sup> were searched in PFAM annotations. In addition,  
436 the most common hemicellulolytic families (GH2, GH10, GH11, GH16, GH26, GH30,  
437 GH31, GH39, GH42, GH43 and GH53)<sup>79</sup> were searched in the PFAM database. Lytic  
438 polysaccharide monooxygenases (LPMO)<sup>79</sup> were also identified using PFAM to investigate  
439 the simultaneous deconstruction of cellulose and hemicellulose.

440 During the degradation of refractory and labile material by exoenzymes, microbes  
441 produce a complex mix of particulate and dissolved organic carbon. The use of this mix is  
442 mediated by a vast diversity of transporter systems<sup>38</sup>. The typical transporters associated to  
443 lignin degradation (MFS transporter, AAHS family, ABC transporters, MHS family, ITS  
444 superfamily and TRAP transporter) were searched with Diamond (v.0.9.22)<sup>72</sup>, using query  
445 coverage  $\geq 50\%$ , protein identity  $\geq 40\%$  and e-value  $\leq 1e-5$  and a reference dataset  
446 previously compiled<sup>37</sup>.

447 Lignin degradation ends in the production of 4-carboxy-4hydroxy-2-oxoadipate,  
448 which is converted into pyruvate or oxaloacetate, both substrates of the tricarboxylic acid  
449 cycle (TCA)<sup>37</sup>, similarly to the fate of hemi-/cellulose degradation byproducts. Recently,  
450 several substrate binding proteins (TctC) belonging to the tripartite tricarboxylate transporter  
451 (TTT) system were related to the transporting of TeOM degradation byproducts, like  
452 adipate<sup>39</sup> and terephthalate<sup>40</sup>. To investigate the metabolism of these compounds, and the  
453 possible link between the TTT system and lignin/cellulose degradation, the protein families  
454 TctA (PF01970), TctB (PF07331) and TctC (PF03401) were searched in PFAM.

455 The genes found using the above mentioned strategy were submitted to PSORT  
456 v.3.0<sup>80</sup>, to determine the protein subcellular localization (cytoplasm, secreted to the outside,  
457 inner membrane, periplasm, or outer membrane). We carried out predictions in the three  
458 possible taxa (Gram negative, Gram positive and Archaea), and the best score was used to  
459 determine the subcellular localization. Genes assigned to an “unknown” location, as well as  
460 those with a wrong assignment were eliminated (for example, genes known to work in  
461 extracellular space that were assigned to the cytoplasmic membrane).

462 The total amount of TeOM degradation genes found per function (lignin oxidation,  
463 transport, hemi-/cellulose degradation and lignin-derived aromatic compounds metabolism)  
464 in each section of the river, were normalized by the maximum gene counts per metagenome.

465 Subsequently, correlograms were produced using Pearson's correlation coefficients with the  
466 R packages Corrplot<sup>81</sup> and RColorBrewer<sup>82</sup>. The linear geographic distance of each  
467 metagenome to the Amazon River source (Mantaro River, Peru, 10° 43' 55" S / 76° 38' 52"  
468 W), was also used in this analysis to infer changes in gene counts along the Amazon River  
469 course. The distance was calculated with the R package Fields<sup>83</sup>.

470

#### 471 *Data availability*

472 Metagenomes used to construct the Amazon River gene catalogue (AMnrGC) are  
473 publicly available (See **Supplementary Table 2**; SRA projects: SRP044326, PRJEB25171  
474 and SRP039390). The AMnrGC, as well as, the annotation files are available in:  
475 10.5281/zenodo.1484503. Metagenomes used in the k-mer diversity comparison are detailed  
476 in **Supplementary Table 3** (SRA projects: Amazon forest [PRJNA336764, PRJNA336766,  
477 PRJNA337825, PRJNA336700, PRJNA336765], Mississippi River [SRP018728] and  
478 Canada watersheds [PRJNA287840]).

479

#### 480 **REFERENCES**

481

- 482 1. Cole, J. J. *et al.* Plumbing the Global Carbon Cycle: Integrating Inland Waters into  
483 the Terrestrial Carbon Budget. *Ecosystems* **10**, 172–185 (2007).
- 484 2. Xenopoulos, M. A., Downing, J. A., Kumar, M. D., Menden-Deuer, S. & Voss, M.  
485 Headwaters to oceans: Ecological and biogeochemical contrasts across the aquatic  
486 continuum: Headwaters to oceans. *Limnol. Oceanogr.* **62**, S3–S14 (2017).
- 487 3. Guenet, B., Danger, M., Abbadie, L. & Lacroix, G. Priming effect: bringing the gap  
488 between terrestrial and aquatic ecology. *Ecology* **91**, 2850–2861 (2010).

- 489 4. Bianchi, T. S. The role of terrestrially derived organic carbon in the coastal ocean: A  
490 changing paradigm and the priming effect. *Proc. Natl. Acad. Sci. U. S. A.* **108**, 19473–19481  
491 (2011).
- 492 5. Mende, D. R. *et al.* Environmental drivers of a microbial genomic transition zone in  
493 the ocean’s interior. *Nat. Microbiol.* **2**, 1367–1373 (2017).
- 494 6. Carradec, Q. *et al.* A global ocean atlas of eukaryotic genes. *Nat. Commun.* **9**, 373  
495 (2018).
- 496 7. Sunagawa, S. *et al.* Structure and function of the global ocean microbiome. *Science*  
497 **348**, 1261359–1261359 (2015).
- 498 8. Bahram, M. *et al.* Structure and function of the global topsoil microbiome. *Nature*  
499 **560**, 233–237 (2018).
- 500 9. Qin, J. *et al.* A human gut microbial gene catalogue established by metagenomic  
501 sequencing. *Nature* **464**, 59–65 (2010).
- 502 10. Pan, H. *et al.* A gene catalogue of the Sprague-Dawley rat gut metagenome.  
503 *GigaScience* **7**, (2018).
- 504 11. Field, Behrenfeld, Randerson & Falkowski. Primary production of the biosphere:  
505 integrating terrestrial and oceanic components. *Science* **281**, 237–40 (1998).
- 506 12. Malhi, Y. *et al.* Climate change, deforestation, and the fate of the Amazon. *Science*  
507 **319**, 169–72 (2008).
- 508 13. Mikhailov, V. N. Water and sediment runoff at the Amazon River mouth. *Water*  
509 *Resour.* **37**, 145–159 (2010).
- 510 14. Subramaniam, A. *et al.* Amazon River enhances diazotrophy and carbon  
511 sequestration in the tropical North Atlantic Ocean. *Proc. Natl. Acad. Sci. U. S. A.* **105**,  
512 10460–5 (2008).

- 513 15. Sioli, H. The Amazon and its main affluents: Hydrography, morphology of the river  
514 courses, and river types. in *The Amazon: Limnology and landscape ecology of a mighty*  
515 *tropical river and its basin* 127–165 (Sioli, H., 1984).
- 516 16. Wissmar, R. C., Richey, J. E., Stallard, R. F. & Edmond, J. M. Plankton Metabolism  
517 and Carbon Processes in the Amazon River, Its Tributaries, and Floodplain Waters, Peru-  
518 Brazil, May-June 1977. *Ecology* **62**, 1622–1633 (1981).
- 519 17. Mayorga, E. *et al.* Young organic matter as a source of carbon dioxide outgassing  
520 from Amazonian rivers. *Nature* **436**, 538 (2005).
- 521 18. Richey, J. E., Melack, J. M., Aufdenkampe, A. K., Ballester, V. M. & Hess, L. L.  
522 Outgassing from Amazonian rivers and wetlands as a large tropical source of atmospheric  
523 CO<sub>2</sub>. *Nature* **416**, 617–620 (2002).
- 524 19. Ward, N. D. *et al.* Degradation of terrestrially derived macromolecules in the  
525 Amazon River. *Nat. Geosci.* **6**, 530–533 (2013).
- 526 20. Ward, N. D. *et al.* The reactivity of plant-derived organic matter and the potential  
527 importance of priming effects along the lower Amazon River. *J. Geophys. Res.*  
528 *Biogeosciences* **121**, 1522–1539 (2016).
- 529 21. Ertel, J. R., Hedges, J. I., Devol, A. H., Richey, J. E. & Ribeiro, M. de N. G.  
530 Dissolved humic substances of the Amazon River system1. *Limnol. Oceanogr.* **31**, 739–754  
531 (1986).
- 532 22. Seidel, M. *et al.* Seasonal and spatial variability of dissolved organic matter  
533 composition in the lower Amazon River. *Biogeochemistry* **131**, 281–302 (2016).
- 534 23. Gagne-Maynard, W. C. *et al.* Evaluation of Primary Production in the Lower  
535 Amazon River Based on a Dissolved Oxygen Stable Isotopic Mass Balance. *Front. Mar. Sci.*  
536 **4**, 26 (2017).

- 537 24. Satinsky, B. M. *et al.* Patterns of Bacterial and Archaeal Gene Expression through  
538 the Lower Amazon River. *Front. Mar. Sci.* **4**, 253 (2017).
- 539 25. Satinsky, B. M. *et al.* Microspatial gene expression patterns in the Amazon River  
540 Plume. *Proc. Natl. Acad. Sci. U. S. A.* **111**, 11085–90 (2014).
- 541 26. Satinsky, B. M. *et al.* Expression patterns of elemental cycling genes in the Amazon  
542 River Plume. *ISME J.* **11**, 1852–1864 (2017).
- 543 27. Payne, C. M. *et al.* Fungal Cellulases. *Chem. Rev.* **115**, 1308–1448 (2015).
- 544 28. van den Brink, J. & de Vries, R. P. Fungal enzyme sets for plant polysaccharide  
545 degradation. *Appl. Microbiol. Biotechnol.* **91**, 1477–1492 (2011).
- 546 29. Kögel-Knabner, I. The macromolecular organic composition of plant and microbial  
547 residues as inputs to soil organic matter. *Soil Biol. Biochem.* **34**, 139–162 (2002).
- 548 30. Pauly, M. & Keegstra, K. Cell-wall carbohydrates and their modification as a  
549 resource for biofuels. *Plant J.* **54**, 559–568 (2008).
- 550 31. Cragg, S. M. *et al.* Lignocellulose degradation mechanisms across the Tree of Life.  
551 *Curr. Opin. Chem. Biol.* **29**, 108–119 (2015).
- 552 32. Sanchez, C. Lignocellulosic residues: Biodegradation and bioconversion by fungi.  
553 *Biotechnol. Adv.* **27**, 185–194 (2009).
- 554 33. Ghai, R. *et al.* Metagenomics of the water column in the pristine upper course of the  
555 Amazon river. *PLoS ONE* **6**, e23785 (2011).
- 556 34. Staley, C. *et al.* Core functional traits of bacterial communities in the Upper  
557 Mississippi River show limited variation in response to land cover. *Front. Microbiol.* **5**,  
558 (2014).
- 559 35. Logares, R. *et al.* Infrequent marine–freshwater transitions in the microbial world.  
560 *Trends Microbiol.* **17**, 414–422 (2009).

- 561 36. Rillig, M. C. *et al.* Interchange of entire communities: microbial community  
562 coalescence. *Trends Ecol. Evol.* **30**, 470–476 (2015).
- 563 37. Kamimura, N. *et al.* Bacterial catabolism of lignin-derived aromatics: New findings  
564 in a recent decade: Update on bacterial lignin catabolism. *Environ. Microbiol. Rep.* **9**, 679–  
565 705 (2017).
- 566 38. Poretsky, R. S., Sun, S., Mou, X. & Moran, M. A. Transporter genes expressed by  
567 coastal bacterioplankton in response to dissolved organic carbon. *Environ. Microbiol.* **12**,  
568 616–627 (2010).
- 569 39. Rosa, L. T., Dix, S. R., Rafferty, J. B. & Kelly, D. J. Structural basis for high-  
570 affinity adipate binding to AdpC (RPA4515), an orphan periplasmic-binding protein from the  
571 tripartite tricarboxylate transporter (TTT) family in *Rhodopseudomonas palustris*. *FEBS J.*  
572 **284**, 4262–4277 (2017).
- 573 40. Hosaka, M. *et al.* Novel tripartite aromatic acid transporter essential for  
574 terephthalate uptake in *Comamonas* sp. strain E6. *Appl. Environ. Microbiol.* **79**, 6148–55  
575 (2013).
- 576 41. Qin, L. *et al.* Inhibition of lignin-derived phenolic compounds to cellulase.  
577 *Biotechnol. Biofuels* **9**, 70 (2016).
- 578 42. Monlau, F. *et al.* Do furanic and phenolic compounds of lignocellulosic and algae  
579 biomass hydrolyzate inhibit anaerobic mixed cultures ? A comprehensive review. *Biotechnol.*  
580 *Adv.* **32**, 934–951 (2014).
- 581 43. Xue, S. *et al.* Water-soluble phenolic compounds produced from extractive  
582 ammonia pretreatment exerted binary inhibitory effects on yeast fermentation using synthetic  
583 hydrolysate. *PLOS ONE* **13**, e0194012 (2018).



- 584 44. Aston, J. E. *et al.* Degradation of phenolic compounds by the lignocellulose  
585 deconstructing thermoacidophilic bacterium *Alicyclobacillus Acidocaldarius*. *J. Ind.*  
586 *Microbiol. Biotechnol.* **43**, 13–23 (2016).
- 587 45. Satinsky, B. M. *et al.* The Amazon continuum dataset: quantitative metagenomic  
588 and metatranscriptomic inventories of the Amazon River plume, June 2010. *Microbiome* **2**,  
589 17 (2014).
- 590 46. Toyama, D. *et al.* Metagenomics Analysis of Microorganisms in Freshwater Lakes  
591 of the Amazon Basin. *Genome Announc* **4**, 1440–16 (2016).
- 592 47. Toyama, D. *Metagenoma da Amazônia: Busca por genes de interesse*  
593 *biotecnológico*. (Federal University of Sao Carlos, 2016).
- 594 48. Santos-Júnior, C. D. *et al.* Metagenome Sequencing of Prokaryotic Microbiota  
595 Collected from Rivers in the Upper Amazon Basin. *Genome Announc.* **5**, e01450–16 (2017).
- 596 49. Farjalla, V. F. Are the mixing zones between aquatic ecosystems hot spots of  
597 bacterial production in the Amazon River system? *Hydrobiologia* **728**, 153–165 (2014).
- 598 50. Laraque, A., Guyot, J. L. & Filizola, N. Mixing processes in the Amazon River at  
599 the confluences of the Negro and Solimões Rivers, Encontro das Águas, Manaus, Brazil.  
600 *Hydrol. Process.* **23**, 3131–3140 (2009).
- 601 51. Martin, M. Cutadapt removes adapter sequences from high-throughput sequencing  
602 reads. *EMBnet.journal* **17**, 10 (2011).
- 603 52. Andrews, S. Babraham Bioinformatics - FastQC A Quality Control tool for High  
604 Throughput Sequence Data. (2017). Available at:  
605 <https://www.bioinformatics.babraham.ac.uk/projects/fastqc/>. (Accessed: 8th November 2017)
- 606 53. Li, D. *et al.* MEGAHIT v1.0: A fast and scalable metagenome assembler driven by  
607 advanced methodologies and community practices. **102**, 3–11 (2016).

- 608 54. Vollmers, J., Wiegand, S. & Kaster, A.-K. Comparing and Evaluating Metagenome  
609 Assembly Tools from a Microbiologist's Perspective - Not Only Size Matters! *PLOS ONE*  
610 **12**, e0169662 (2017).
- 611 55. Gurevich, A., Saveliev, V., Vyahhi, N. & Tesler, G. QUASt: Quality assessment  
612 tool for genome assemblies. *Bioinformatics* **29**, 1072–1075 (2013).
- 613 56. Staley, C. *et al.* Bacterial community structure is indicative of chemical inputs in the  
614 Upper Mississippi River. *Front. Microbiol.* **5**, 524 (2014).
- 615 57. Van Rossum, T. *et al.* Year-Long Metagenomic Study of River Microbiomes Across  
616 Land Use and Water Quality. *Front. Microbiol.* **6**, 1405 (2015).
- 617 58. Meyer, K. M. *et al.* Conversion of Amazon rainforest to agriculture alters  
618 community traits of methane-cycling organisms. *Mol. Ecol.* **26**, 1547–1556 (2017).
- 619 59. Benoit, G. *et al.* Multiple comparative metagenomics using multiset k-mer counting.  
620 *PeerJ Comput. Sci.* **2**, e94 (2016).
- 621 60. Dixon, P. VEGAN, a package of R functions for community ecology. *J. Veg. Sci.*  
622 **14**, 927–930 (2003).
- 623 61. Hyatt, D. *et al.* Prodigal: prokaryotic gene recognition and translation initiation site  
624 identification. *BMC Bioinformatics* **11**, 119 (2010).
- 625 62. Fu, L., Niu, B., Zhu, Z., Wu, S. & Li, W. CD-HIT: accelerated for clustering the  
626 next-generation sequencing data. *Bioinformatics* **28**, 3150–3152 (2012).
- 627 63. Li, W. & Godzik, A. Cd-hit: a fast program for clustering and comparing large sets  
628 of protein or nucleotide sequences. *Bioinformatics* **22**, 1658–1659 (2006).
- 629 64. Rice, P., Longden, I. & Bleasby, A. EMBOSS: the European Molecular Biology  
630 Open Software Suite. *Trends Genet. TIG* **16**, 276–7 (2000).
- 631 65. Li, H. & Durbin, R. Fast and accurate short read alignment with Burrows-Wheeler  
632 transform. *Bioinformatics* **25**, 1754–1760 (2009).

- 633 66. Li, H. *et al.* The Sequence Alignment/Map format and SAMtools. *Bioinformatics*  
634 **25**, 2078–2079 (2009).
- 635 67. Roberts, A. & Pachter, L. Streaming fragment assignment for real-time analysis of  
636 sequencing experiments. *Nat. Methods* **10**, 71–73 (2012).
- 637 68. Kanehisa, M., Goto, S., Sato, Y., Furumichi, M. & Tanabe, M. KEGG for  
638 integration and interpretation of large-scale molecular data sets. *Nucleic Acids Res.* **40**,  
639 D109–14 (2012).
- 640 69. Tatusov, R. L. *et al.* The COG database: an updated version includes eukaryotes.  
641 *BMC Bioinformatics* **4**, 41 (2003).
- 642 70. Sun, S. *et al.* Community cyberinfrastructure for Advanced Microbial Ecology  
643 Research and Analysis: the CAMERA resource. *Nucleic Acids Res.* **39**, D546–51 (2011).
- 644 71. UniProt Consortium. UniProt: a hub for protein information. *Nucleic Acids Res.* **43**,  
645 D204–D212 (2015).
- 646 72. Buchfink, B., Xie, C. & Huson, D. H. Fast and sensitive protein alignment using  
647 DIAMOND. *Nat. Methods* **12**, 59–60 (2014).
- 648 73. Kanehisa, M., Furumichi, M., Tanabe, M., Sato, Y. & Morishima, K. KEGG: new  
649 perspectives on genomes, pathways, diseases and drugs. *Nucleic Acids Res.* **45**, D353–D361  
650 (2017).
- 651 74. Eddy, S. R. Accelerated Profile HMM Searches. *PLoS Comput. Biol.* **7**, e1002195  
652 (2011).
- 653 75. Yin, Y. *et al.* dbCAN: a web resource for automated carbohydrate-active enzyme  
654 annotation. *Nucleic Acids Res.* **40**, W445–51 (2012).
- 655 76. Finn, R. D. *et al.* The Pfam protein families database: towards a more sustainable  
656 future. *Nucleic Acids Res.* **44**, D279–85 (2016).

- 657 77. Huerta-Cepas, J. *et al.* eggNOG 4.5: a hierarchical orthology framework with  
658 improved functional annotations for eukaryotic, prokaryotic and viral sequences. *Nucleic*  
659 *Acids Res.* **44**, D286–D293 (2016).
- 660 78. Brumm, P. J. Bacterial genomes: what they teach us about cellulose degradation.  
661 *Biofuels* **4**, 669–681 (2013).
- 662 79. López-Mondéjar, R., Zühlke, D., Becher, D., Riedel, K. & Baldrian, P. Cellulose  
663 and hemicellulose decomposition by forest soil bacteria proceeds by the action of structurally  
664 variable enzymatic systems. *Sci. Rep.* **6**, (2016).
- 665 80. Yu, N. Y. *et al.* PSORTb 3.0: improved protein subcellular localization prediction  
666 with refined localization subcategories and predictive capabilities for all prokaryotes.  
667 *Bioinformatics* **26**, 1608–1615 (2010).
- 668 81. Wei, T. & Simko, V. R package ‘corrplot’: Visualization of a Correlation Matrix.  
669 (2017). Available at: <https://github.com/taiyun/corrplot>.
- 670 82. Neuwirth, E. *CRAN - Package ColorBrewer Palettes.* (Comprehensive R Archive  
671 Network (CRAN), 2014).
- 672 83. Nychka, D. *et al. fields: Tools for spatial data.* (University Corporation for  
673 Atmospheric Research, 2017). doi:10.5065/D6W957CT

674

## 675 **Acknowledgements**

676 C.D.S.J. was supported by a PhD scholarship from Conselho Nacional de  
677 Desenvolvimento Científico e Tecnológico, Brazil (CNPq #141112/2016-6). F.H.S. and H.S  
678 work was supported by Research Productivity grants from CNPq (Process # 311746/2017-9  
679 and #309514/2017-7, respectively). R.L. was supported by a Ramón y Cajal fellowship  
680 (RYC-2013-12554, MINECO, Spain). This work was supported by Petróleo Brasileiro S.A.  
681 (Petrobras), as part of a research agreement (#0050.0081178.13.9) with the Federal

682 University of São Carlos, SP, Brazil, within the context of the Geochemistry Thematic  
683 Network. Additionally, this work was supported by the projects INTERACTOMICS  
684 (CTM2015-69936-P, MINECO, Spain) and MicroEcoSystems (240904, RCN, Norway) to  
685 RL and Fundação de Amparo à Pesquisa do Estado de São Paulo – FAPESP (Process  
686 #2014/14139-3) to HS. This study was financed in part by the Coordenação de  
687 Aperfeiçoamento de Pessoal de Nível Superior - Brasil (CAPES) - Finance Code 001  
688 (CAPES #88881.131637/2016-01). Bioinformatics analyses were performed at the  
689 MARBITS platform of the Institut de Ciències del Mar (ICM; <http://marbits.icm.csic.es>) as  
690 well as in MareNostrum (Barcelona Supercomputing Center) via grants obtained from the  
691 Spanish Network of Supercomputing (RES) to RL. We thank Pablo Sánchez for his  
692 orientation with bioinformatics analyses and support. We also thank the EMM group  
693 (<https://emm.icm.csic.es>) at the ICM-CSIC for all the support and cordiality during the  
694 development of part of this work.

695

## 696 **Contributions**

697 CDSJ, FHS & RL designed the study. CDSJ compiled and curated the data and performed  
698 bioinformatic analysis. CDSJ, FHS, HS & RL interpreted the results. FHS, RL, FPM and HS  
699 supervised and administered the project, providing funding. The original draft was written by  
700 CDSJ. All co-authors contributed substantially to manuscript revisions.

701

## 702 **Competing interests**

703 Fernando Pellon de Miranda is employed by Petroleo Brasileiro S.A - Petrobras, Brasil.

704

705

706

707

## FIGURES

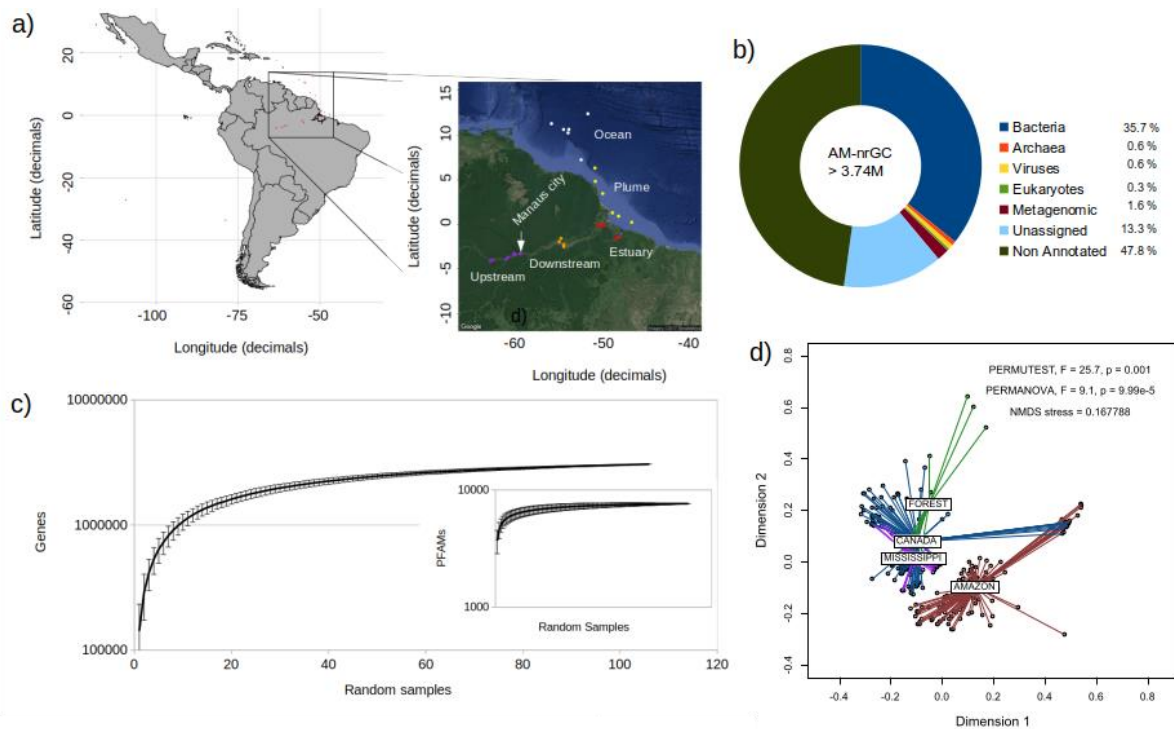

708

### 709 **Figure 1. The Amazon River Basin Microbial Non-Redundant Gene Catalogue**

710 **(AMnrGC).** a) Distribution of the 106 metagenomes used in this work over the five sections

711 of the Amazon River: Upstream (purple dots), Downstream (orange dots), Estuary (red dots),

712 Plume (yellow dots) and coastal Ocean (white dots). b) Taxonomic classification of the ~ 3.7

713 million genes in the AMnrGC. “Unassigned” genes were not assigned taxonomy, but they

714 were functionally assigned, differently from “non-annotated” genes, which do not have any

715 ortholog. Those genes displaying orthology to poorly characterized genes found in

716 metagenomes were referred as “Metagenomic”. c) Accumulation curves of non-redundant

717 genes and PFAM families (internal graphic) point towards saturation. d) NMDS comparing

718 the Amazon river microbiome with other microbiomes based on information content [K-mer

719 composition; Amazon river (AMAZON), Amazon forest soil (FOREST), Canada watersheds

720 (CANADA) and Mississippi river (MISSISSIPPI)].

721

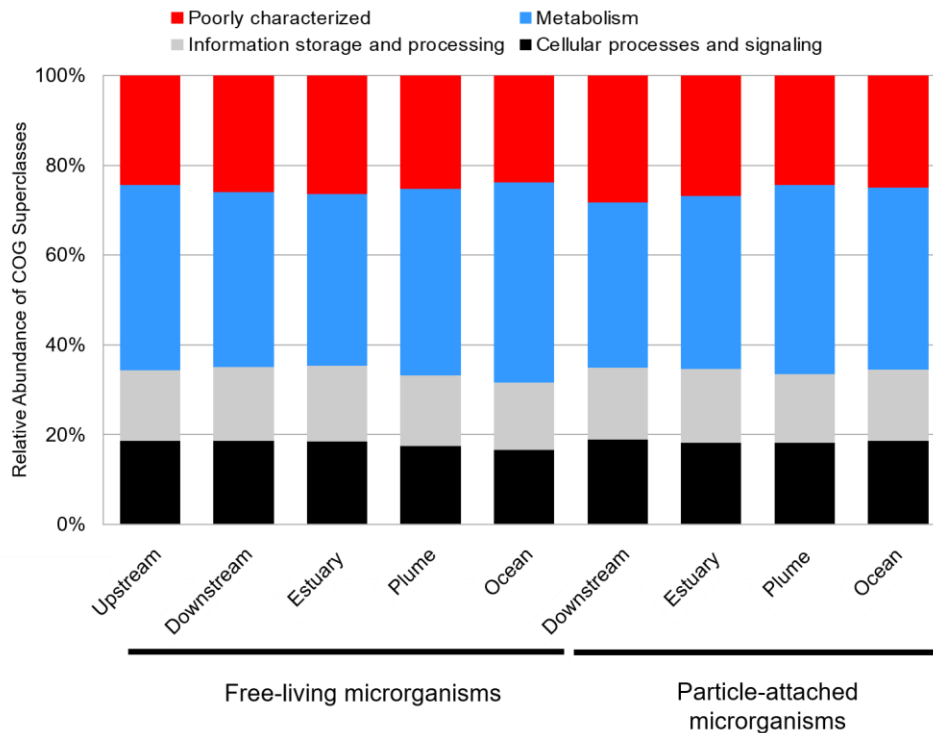

722

723 **Figure 2. Functional composition across microbial lifestyles and sections of the Amazon**

724 **River.** Gene functions grouped into COG super classes are shown per river section and  
725 microbial lifestyle (particle-attached vs. free-living). Functions related to the metabolism  
726 super class were more represented in free-living that in particle-attached communities ( $p <$   
727  $0.05$ , Mann-Whitney U Test). In fresh- and brackish water, all COG classes were  
728 differentially distributed, with higher gene diversities observed in freshwaters ( $p < 0.01$ ,  
729 Mann-Whitney U Test). The Upstream river section is not shown in the particle-associated  
730 fraction, since it was not sampled.

731

732

733

734

735

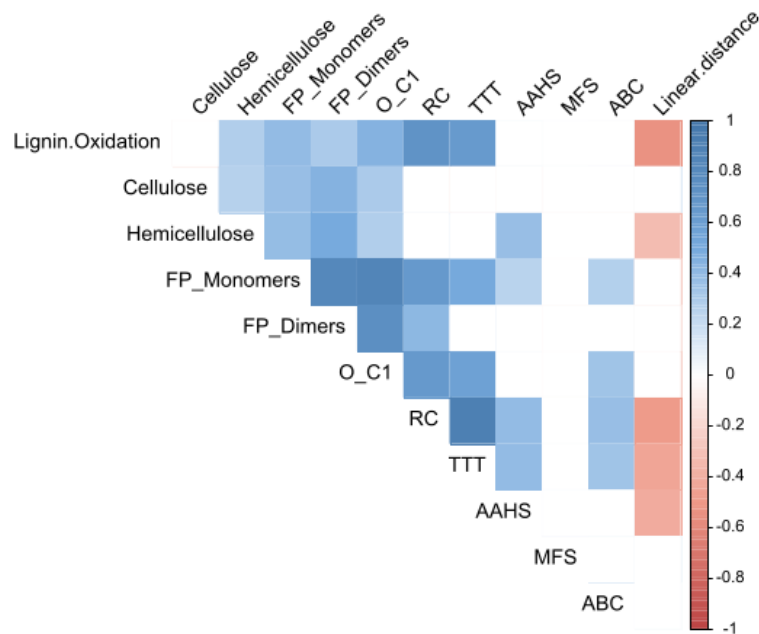

736

737 **Figure 3. Correlations among genes associated to the processing of TeOM and**  
738 **geographic distance in the Amazon River.** Correlations between the number of genes  
739 associated to lignin oxidation (Lignin.Oxidation), cellulose and hemicellulose deconstruction  
740 (cellulose and hemicellulose, respectively), transporting systems (AAHS, MFS, ABC and  
741 TTT), lignin-derived aromatic compounds processing pathways (RC: Ring cleavage  
742 pathways; O\_C1: O demethylation / C1 metabolism pathways; Funneling pathways of  
743 Dimers - FP\_Dimers and Monomers - FP\_Monomers), and linear geographic distance using  
744 the river source as a starting point (Linear.distance). Color indicates correlation strength.  
745 Only significant correlations ( $p < 0.01$ ) are shown.



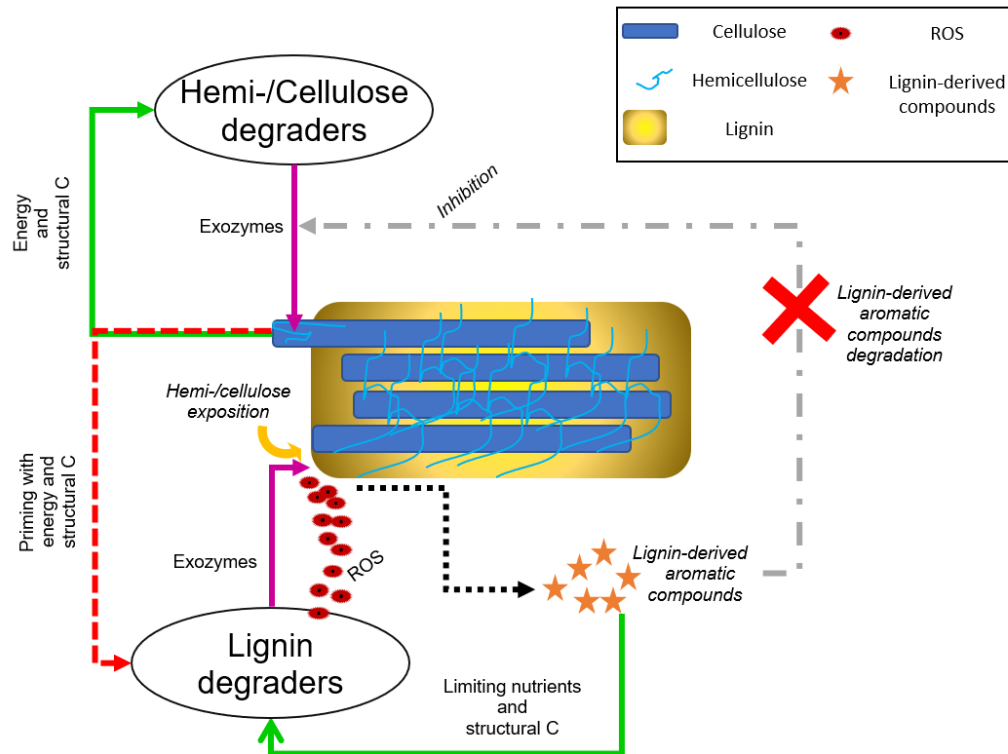

746

747 **Figure 4. Priming effect model of microbial TeOM degradation in the Amazon River.**

748 The cellulolytic communities degrade hemi-/cellulose through secretion of glucosyl  
 749 hydrolases (mainly GH3/GH10) which releases sugars to the environment. These sugars can  
 750 promote growth in the cellulolytic and lignolytic communities, and during this process, the  
 751 oxidative metabolism produces reactive oxygen species (ROS). ROS activate the exoenzymes  
 752 (mainly through DYPs and laccases) secreted by the lignolytic community to oxidize lignin.  
 753 After lignin oxidation, the hemi-/cellulose becomes exposed again, helping the cellulolytic  
 754 communities to degrade it. During the previous process, several aromatic compounds are  
 755 formed, which can potentially inhibit cellulolytic enzymes and microbial growth. However,  
 756 these compounds are consumed by lignolytic microorganisms, reducing their concentration in  
 757 the environment allowing decomposition to proceed. [Legend: green arrows – feedback; red  
 758 dashed arrow – priming effect; black dashed arrow – products; magenta arrows – release of  
 759 exoenzymes over a substrate; gray arrow – inhibition that cellulolytic organisms suffer from  
 760 byproducts of lignin oxidation]

761 **SUPPLEMENTARY TABLES**

762

763 **Supplementary Table 1. Co-assembly groups used to build the *Amazon River basin***

764 ***Microbial non-redundant Genes Catalogue (AMnrGC).***

765

766 **Supplementary Table 2. Metagenomes used to build the *Amazon river basin Microbial***

767 ***non-redundant Genes Catalogue (AMnrGC).*** Description of the 106 metagenomes used in

768 this study. The Amazon River basin region shows the group that a sample belongs according

769 to its geographical location. Other features were obtained from the original publications and

770 SRA. “N.A.” stands for not available.

771

772 **Supplementary Table 3. Metagenomes used for K-mer diversity assessment.**

773

774 **Supplementary Table 4. Reference proteins and Protein Families used in TeOM**

775 **degradation functional searches.** PFAMs related to lignin oxidation, cellulose and

776 hemicellulose degradation used to detect and annotate orthologous in the AMnrGC<sup>37</sup>.
